# Supplementary material for: Ultrafast spectral hole burning reveals the distinct chromophores in eumelanin and their common photoresponse
Source: Royal Society of Chemistry journal article supplement (doi:10.1039/c9sc04527a), 2019-12-18
Supplement: c9sc04527a2.pdf [file c9sc04527a2.pdf]

# The Colours in Black : An Ultrafast Spectral Study of Eumelanin

Eumelanin is a brown-black pigment that dissipates harmful solar light and prevents cell damage in many organisms

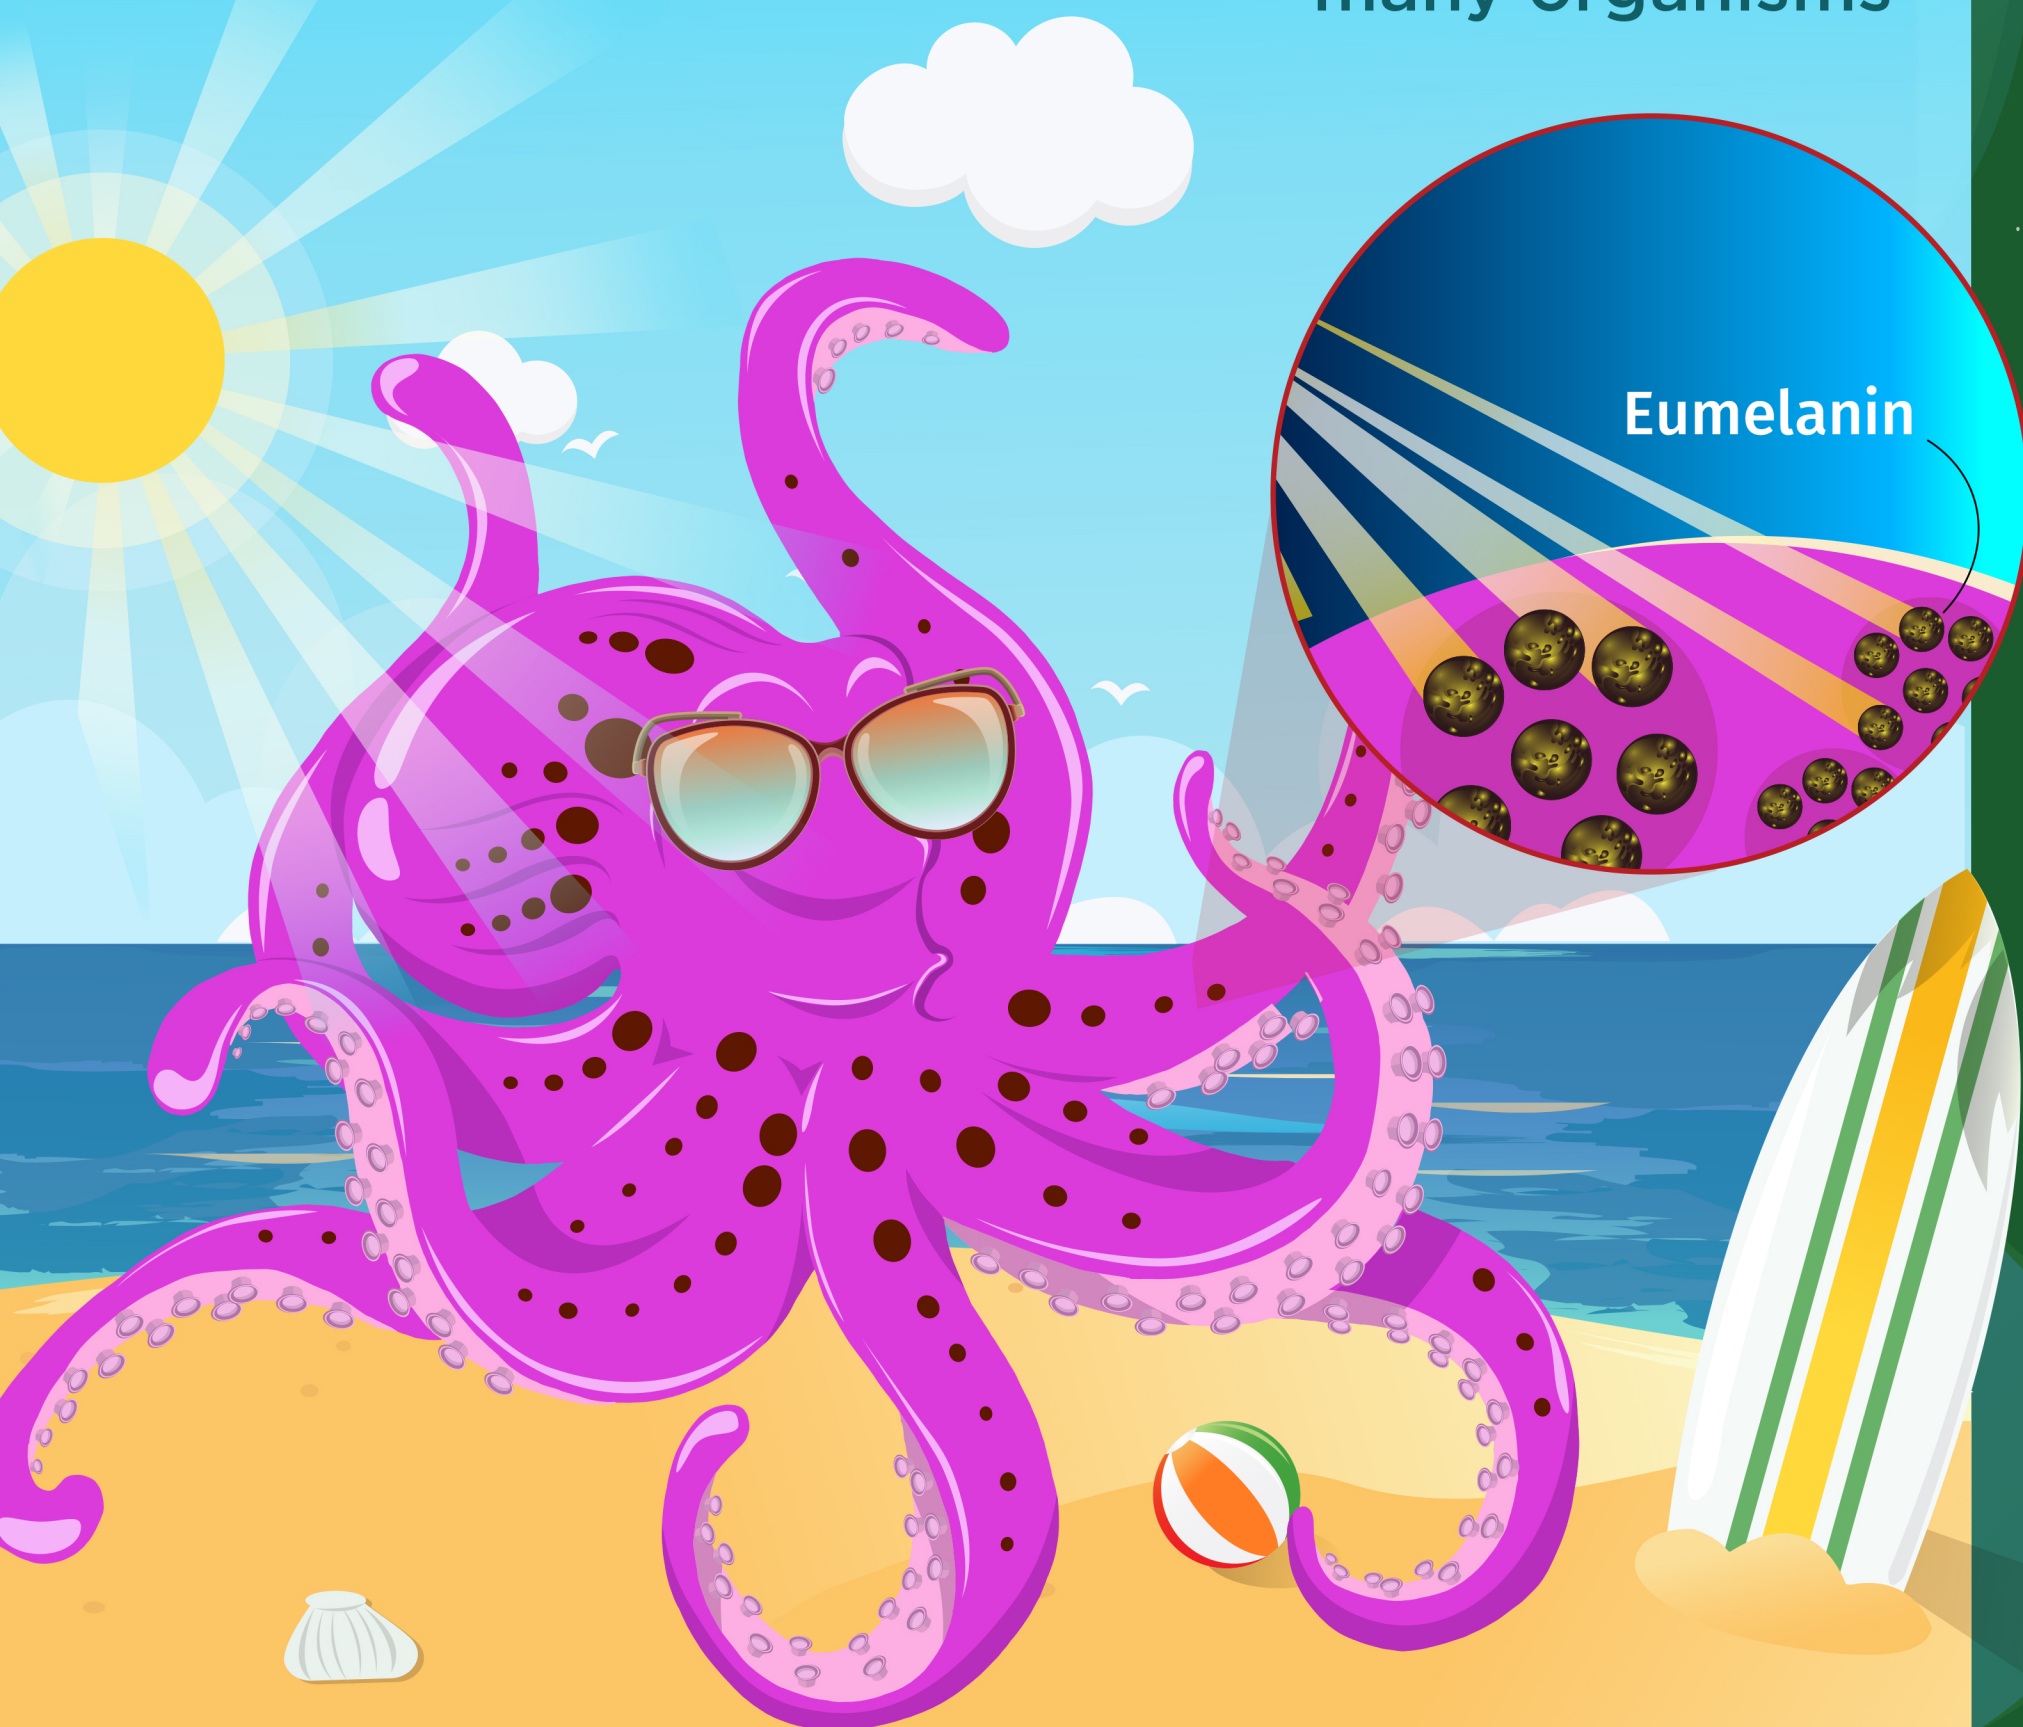

The chromophores that help eumelanin absorb light over a broad spectrum and their characteristics remain unclear

## What are the light absorption characteristics of chromophores in eumelanin?

Using ultrafast spectral hole burning, the excited state behaviour of synthetic eumelanin was studied

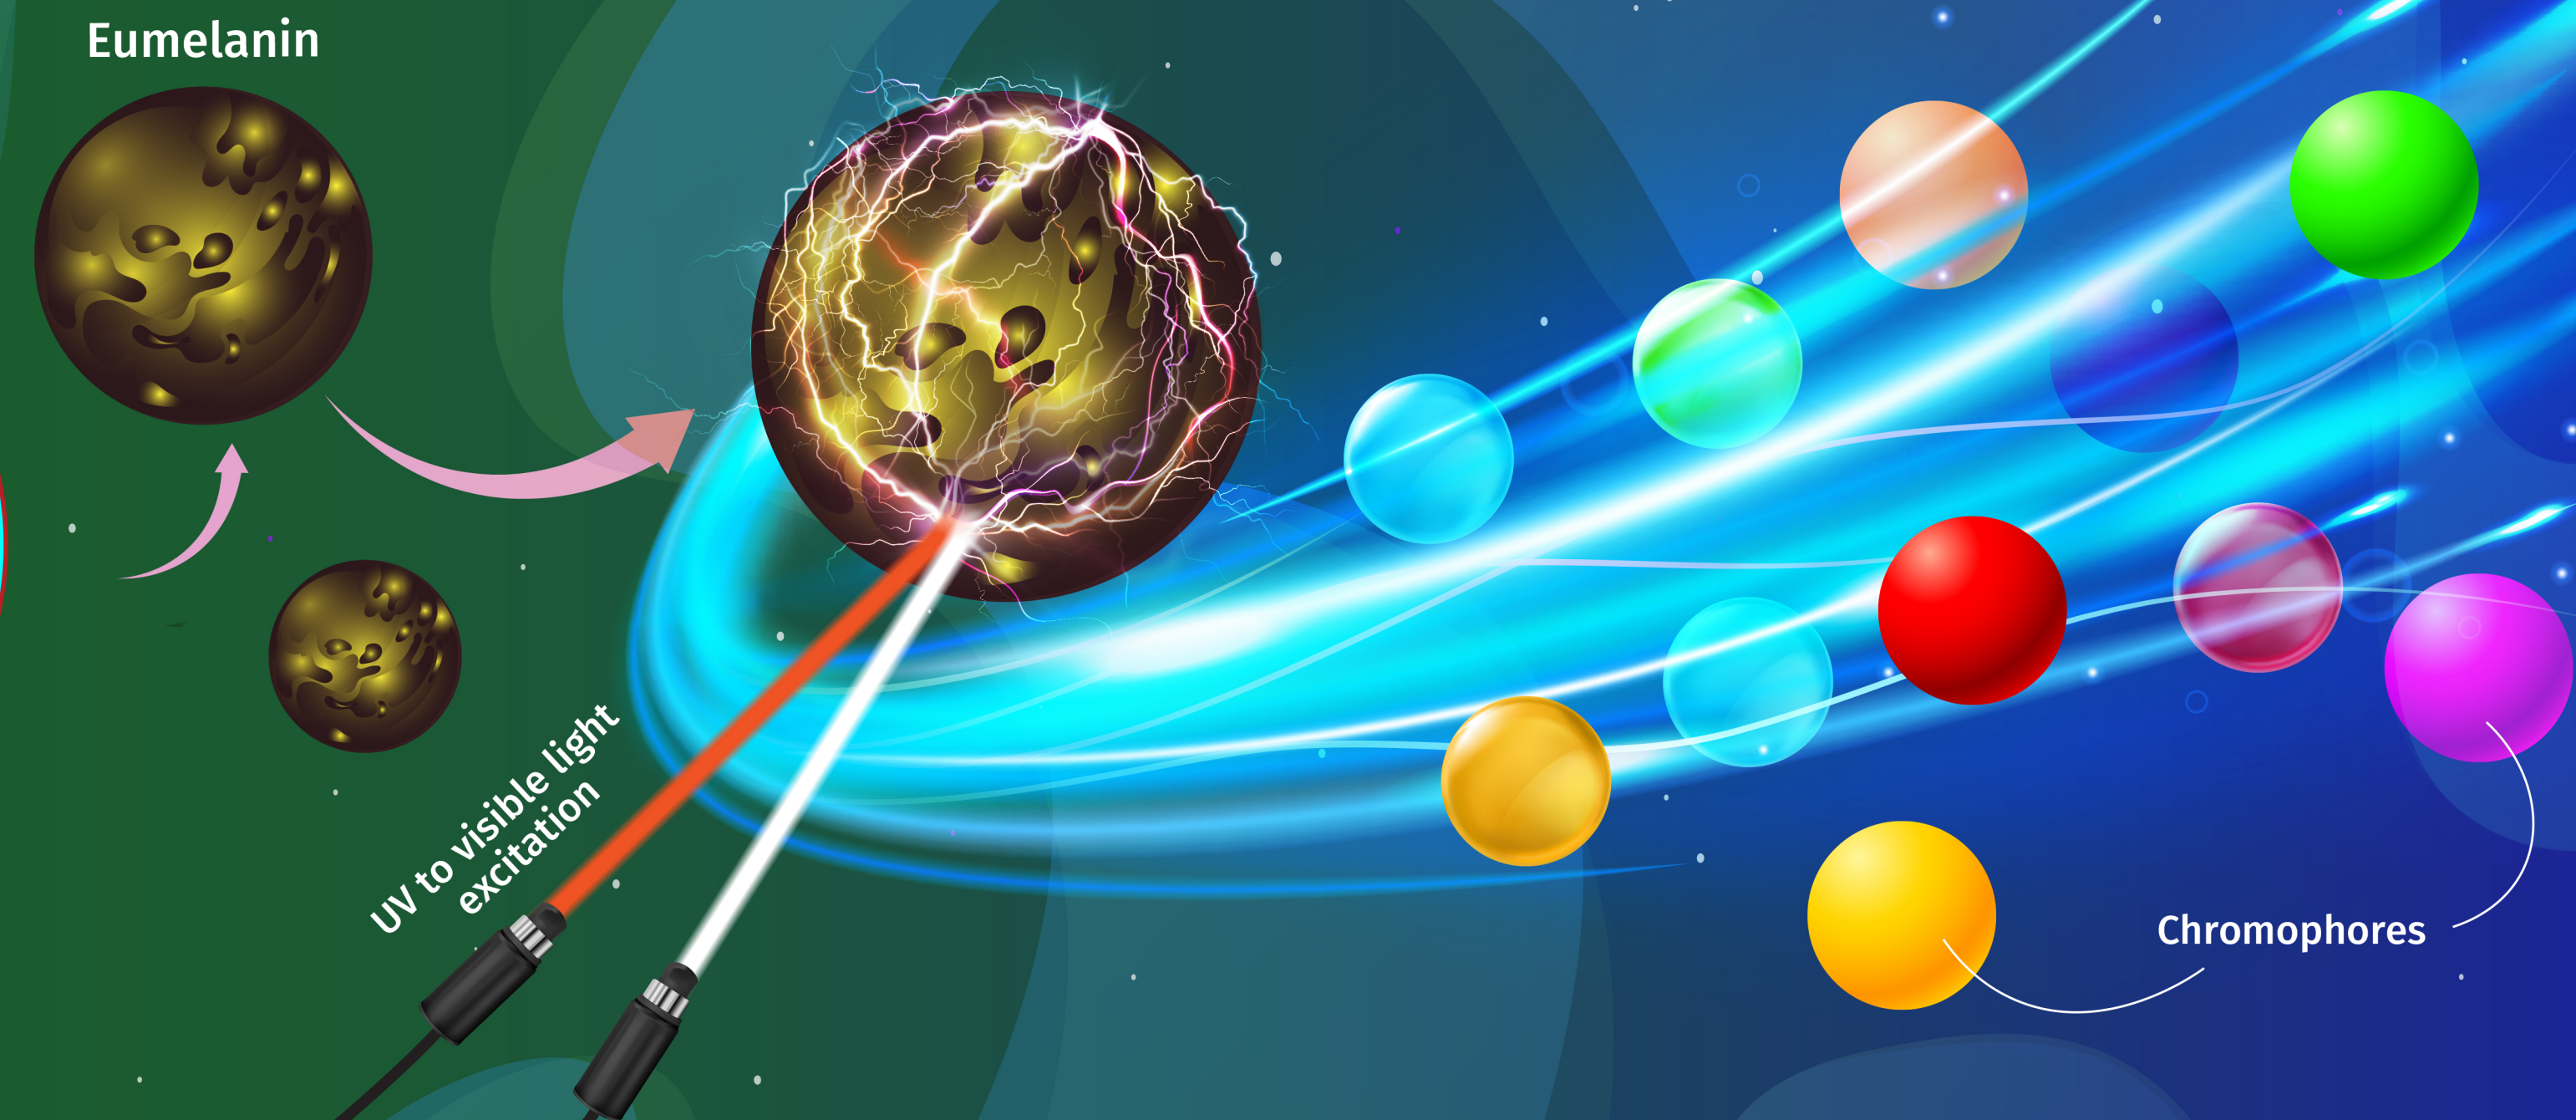

Eumelanin has a large number of coloured chromophores which share excited state dynamics with disordered carbon nanomaterials

**Understanding chromophore dynamics of eumelanin will be invaluable for developing structure–function models for many carbonaceous nanomaterials**

Chemical  
Science

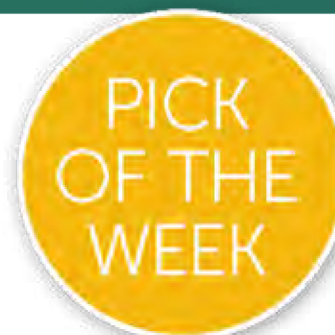

Ultrafast spectral hole burning reveals the distinct chromophores in eumelanin and their common photoresponse

Kohler *et al.* (2019) | DOI: 10.1039/C9SC04527A

ROYAL SOCIETY  
OF CHEMISTRY
